# Supplementary material for: The L1-ORF1p coiled coil enables formation of a tightly compacted nucleic acid-bound complex that is associated with retrotransposition
Source: PubMed Central journal article supplement (PMC9410894; doi:10.1093/nar/gkac628), 2022-07-25
Supplement: gkac628_supplemental_file.pdf [file gkac628_supplemental_file.pdf]

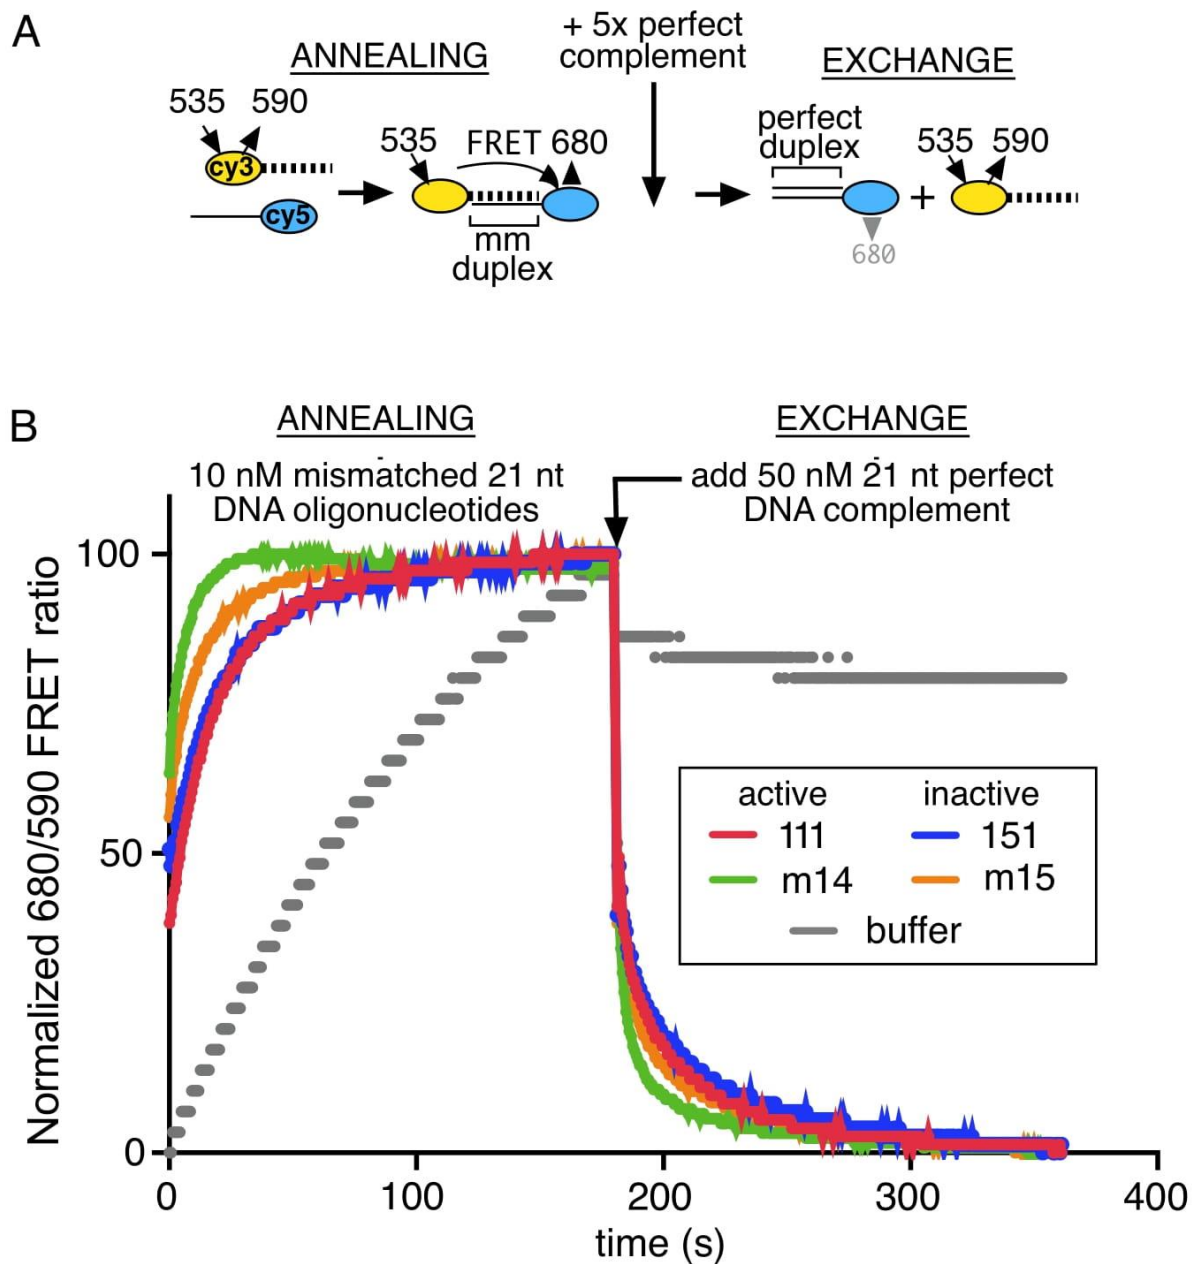

**Figure 1S: FRET-based NA chaperone assay**

This assay was carried out as described in the legend of Figure 3 of reference 32 of the main paper.

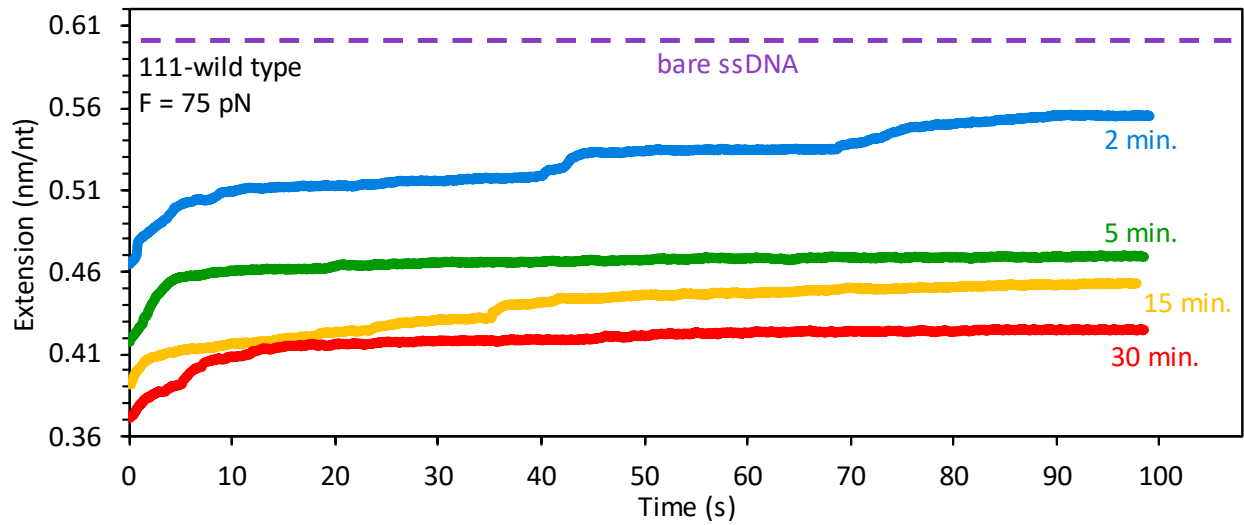

**Figure 2S: ORF1p-ssDNA elongation at high force**

Gradual elongation events which occur at high force (75 pN) following incubation (2, 5, 15, and 30 min.) of 111p at a minimal, fixed extension of 0.2 nm/nt (corresponding to step 2 outlined in Fig. 3). As incubation time is increased, the complex remains more compact at high force. Purple dashed line indicates extension of bare ssDNA at 75 pN for reference.

m14p elution from  
heparin column

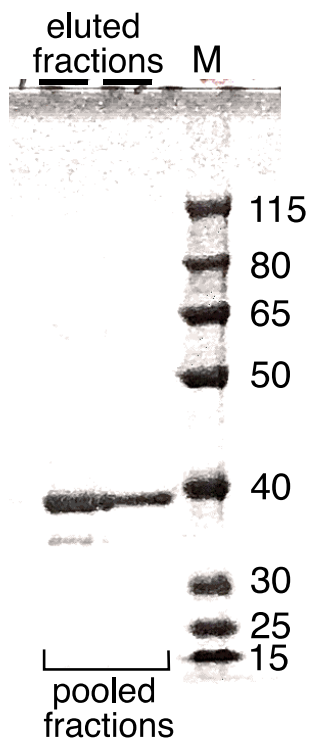

m15p elution from  
heparin column

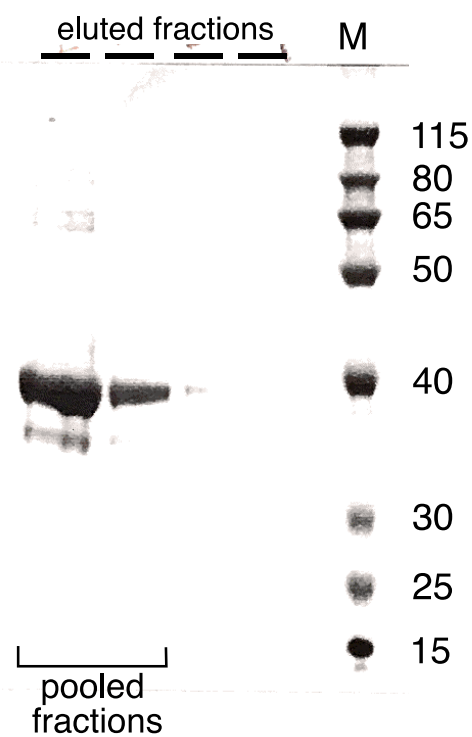

**Figure 3S: Denaturing gel electrophoresis of m14p and m15p ORF1 proteins**

Denaturing polyacrylamide gel electrophoresis of the final purification step of the m14p and m15p ORF1 proteins expressed and purified as described in the Materials and Methods and in full detail in (28). Electrophoresis was performed per the supplier's instructions on 10% 1mm Bis-Tris NuPAGE Minigels (Thermo Fisher – NP0301) and electrophoresed for about 1 hour at room temperature and 200 constant V using 1x NuPAGE® MOPS SDS Running Buffer (NP0001) and stained with Coomassie Blue.

**Table 1S: Dynamics of ORF1p-ssDNA compaction at low, fixed force**

| F = 5 pN                                             | 111p          | m14p          | 151p         | m15p          |
|------------------------------------------------------|---------------|---------------|--------------|---------------|
| $\Delta x_+^i$ (nm/nt)                               | -0.176±0.004  | -0.173±0.009  | -0.170±0.014 | -0.173±0.006  |
| $k_+^i$ (s <sup>-1</sup> )                           | 0.430±0.038   | 0.455±0.064   | 0.424±0.053  | 0.432±0.034   |
| $\Delta x_+^s$ (nm/nt)                               | -0.110±0.009  | -0.102±0.007  | -0.002±0.002 | -0.032±0.009  |
| $k_+^s$ (s <sup>-1</sup> )                           | 0.0094±0.0013 | 0.0096±0.0009 | N/A          | 0.0089±0.0005 |
| $\Delta x_+^f = \Delta x_+^i + \Delta x_+^s$ (nm/nt) | -0.286±0.010  | -0.275±0.012  | -0.173±0.014 | -0.205±0.011  |

Extension changes and rates for 111p and mutant ORF1p-DNA complexes generated with 30 nM protein at 5 pN. Data were fit to a two-decaying exponential function:  $\Delta x(t) = \Delta x_+^i(1 - e^{-k_+^i t}) + \Delta x_+^s(1 - e^{-k_+^s t})$  where, respectively,  $\Delta x_+^i$  and  $k_+^i$  are the magnitude and rate of the initial, “fast” compaction due to ORF1p binding, and  $\Delta x_+^s$  and  $k_+^s$  are the magnitude and rate of the secondary, “slow” compaction due to interprotein interactions (see Fig. 2). “N/A”, not calculated as compaction was negligible.

**Table 2S: Dynamics of ORF1p-ssDNA compaction at low, fixed extension**

| x = 0.2 nm/nt              | Incubation time (min.) | 111p        | m14p        | 151p        | m15p        |
|----------------------------|------------------------|-------------|-------------|-------------|-------------|
| Stretch extension at 30 pN | 2                      | 0.639±0.086 | 0.638±0.027 | 0.762±0.048 | 0.651±0.031 |
|                            | 5                      | 0.502±0.036 | 0.573±0.021 | 0.681±0.005 | 0.647±0.028 |
|                            | 15                     | 0.416±0.061 | 0.440±0.019 | 0.604±0.025 | 0.592±0.029 |
|                            | 30                     | 0.399±0.050 | 0.429±0.052 | 0.606±0.009 | 0.627±0.035 |
| Release extension at 30 pN | 2                      | 0.919±0.046 | 0.925±0.040 | 0.963±0.005 | 0.981±0.009 |
|                            | 5                      | 0.893±0.042 | 0.848±0.068 | 0.949±0.007 | 0.952±0.029 |
|                            | 15                     | 0.803±0.029 | 0.766±0.026 | 0.918±0.028 | 0.898±0.036 |
|                            | 30                     | 0.641±0.013 | 0.644±0.055 | 0.917±0.020 | 0.871±0.038 |

Normalized 30 pN extension values from ORF1p stretch and release cycles upon incubation at ~0.2 nm/nt. All values were normalized with respect to the extension of bare ssDNA and taken with an initial incubation concentration of 30 nM (see Fig. 3).

**Table 3S: Binding phases (30 nM) of active (111p, m14) and inactive (151p, m15) trimers at 30 pN**

| F = 30 pN                  | 111p         | m14p         | 151p         | m15p         |
|----------------------------|--------------|--------------|--------------|--------------|
| $\Delta x_+^i$ (nm/nt)     | -0.025±0.001 | -0.026±0.001 | -0.026±0.001 | -0.026±0.001 |
| $k_+^i$ (s <sup>-1</sup> ) | 0.349±0.048  | 0.341±0.032  | 0.371±0.047  | 0.363±0.030  |
| $\Delta x_+^f$ (nm/nt)     | -0.012±0.001 | -0.012±0.001 | -0.012±0.001 | -0.013±0.001 |
| $k_+^f$ (s <sup>-1</sup> ) | 0.121±0.030  | 0.139±0.019  | 0.135±0.014  | 0.132±0.023  |

Extension changes and rates associated with the binding phases of wild type ORF1p and the coiled coil variants. All data were taken at 30 pN with a protein incubation concentration of 30 nM (see Fig. 4).

**Table 4S: Dissociation phases (in the absence of protein) of active (111p, m14) and inactive (151p, m15) trimers at 30 pN**

| F = 30 pN                | 111p          | m14p          | 151p          | m15p          |
|--------------------------|---------------|---------------|---------------|---------------|
| $\Delta x^i$ (nm/nt)     | -0.029±0.001  | -0.029±0.001  | -0.028±0.001  | -0.029±0.001  |
| $k^i$ (s <sup>-1</sup> ) | 0.050±0.007   | 0.063±0.007   | 0.119±0.014   | 0.104±0.011   |
| Fraction diss.           | 0.519±0.062   | 0.607±0.050   | 0.950±0.050   | 0.918±0.045   |
| $k^f$ (s <sup>-1</sup> ) | 0.0029±0.0010 | 0.0036±0.0012 | 0.0099±0.0006 | 0.0085±0.0008 |

Extension changes and rates associated with the dissociation phases of wild type ORF1p and the coiled coil variants. All data were taken at 30 pN with a protein incubation concentration of 30 nM. The fraction of ORF1p that dissociated from the ssDNA was approximated as  $1 - \Delta x^f / \Delta x^i$  where  $\Delta x^f$  is the final, equilibrium extension change of the protein-DNA complex in the absence of free protein and  $\Delta x^i$  is the extension change of the re-compacted complex preceding final dissociation (see Fig. 5).
